# Supplementary material
Source: Springer Nature journal article supplement (https://www.springermedizin.de/resource/supplementary/12958_2009_618_MOESM3_ESM.pdf/9568106)

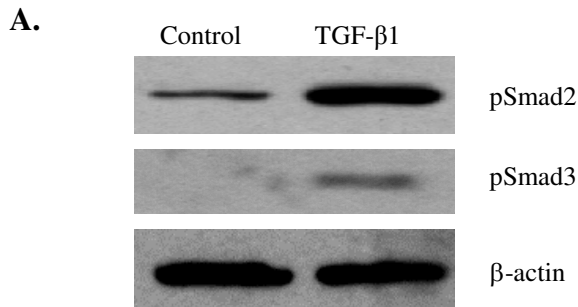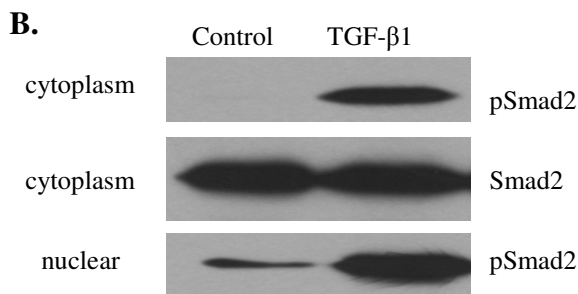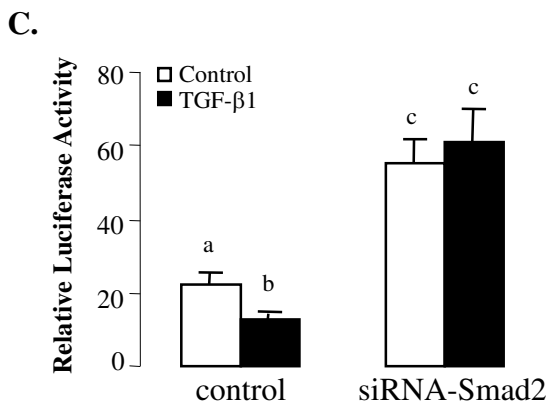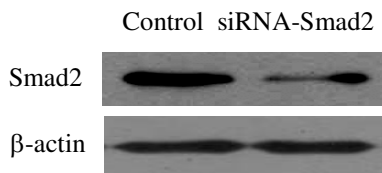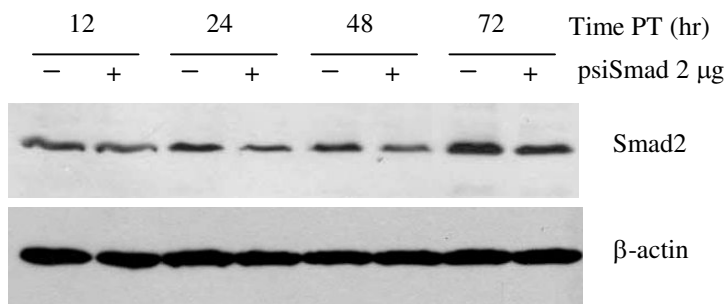

Supplement: MOESM3 [file 9568106]
